# Supplementary material for: DNA photocleavage in anaerobic conditions by a Ru(ii) polypyridyl complex with long wavelength MLCT absorption
Source: Royal Society of Chemistry journal article supplement (doi:10.1039/b9nj00465c), 2009-11-03
Supplement: b9nj00465c.pdf [file b9nj00465c.pdf]

## Supporting Information for

### DNA Photocleavage in anaerobic conditions by a Ru(II) polypyridyl complex with long wavelength MLCT absorption

Qian-Xiong Zhou,<sup>a,b</sup> Wan-Hua Lei,<sup>a</sup> Chao Li,<sup>a</sup> Yuan-Jun Hou,<sup>a</sup> Xue-Song Wang,<sup>\*a</sup> Bao-Wen Zhang<sup>\*a</sup>

<sup>a</sup> Key Laboratory of Photochemical Conversion and Optoelectronic Materials, Technical Institute of Physics and  
Chemistry, Chinese Academy of Sciences, Beijing 100190, P. R. China

<sup>b</sup> Graduate School of Chinese Academy of Sciences, Beijing 100049, P. R. China

#### 1. The photostability of $[\text{Ru}(\text{bpy})_2(\text{dpb})]^{2+}$

Figure S1 and Figure S2 show the UV-vis absorption spectra and  $^1\text{H}$  NMR spectra before and after irradiation with the light above 470 nm for 1 hour, a condition similar to the DNA cleavage experiments. No spectrum changes were found after irradiation, suggesting that  $[\text{Ru}(\text{bpy})_2(\text{dpb})]^{2+}$  is stable enough at least under the employed conditions. Notably, the absorption spectrum of  $[\text{Ru}(\text{bpy})_2(\text{dpb})]^{2+}$  undergoes remarkable bathochromic shift in PBS buffer (pH = 7.4) than in acetonitrile, which is favorable for PDT application.

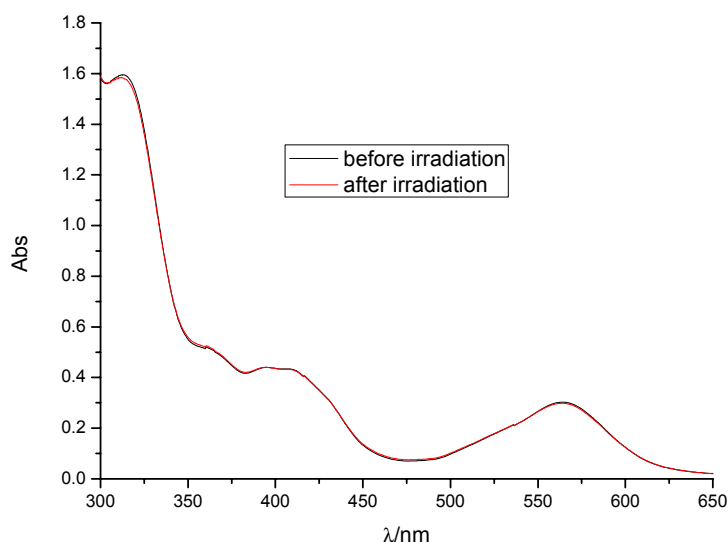

**Figure S1.** UV-vis absorption spectra of  $[\text{Ru}(\text{bpy})_2(\text{dpb})]^{2+}$  in PBS buffer (pH = 7.4) before and after irradiation ( $> 470$  nm) for an hour.

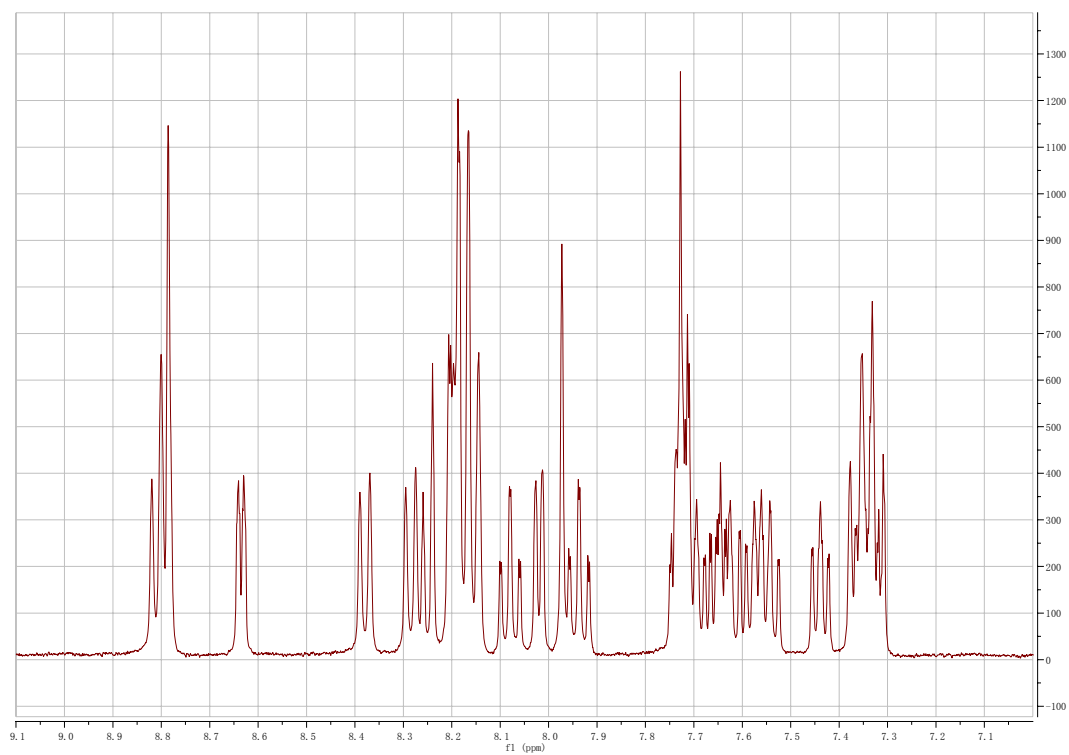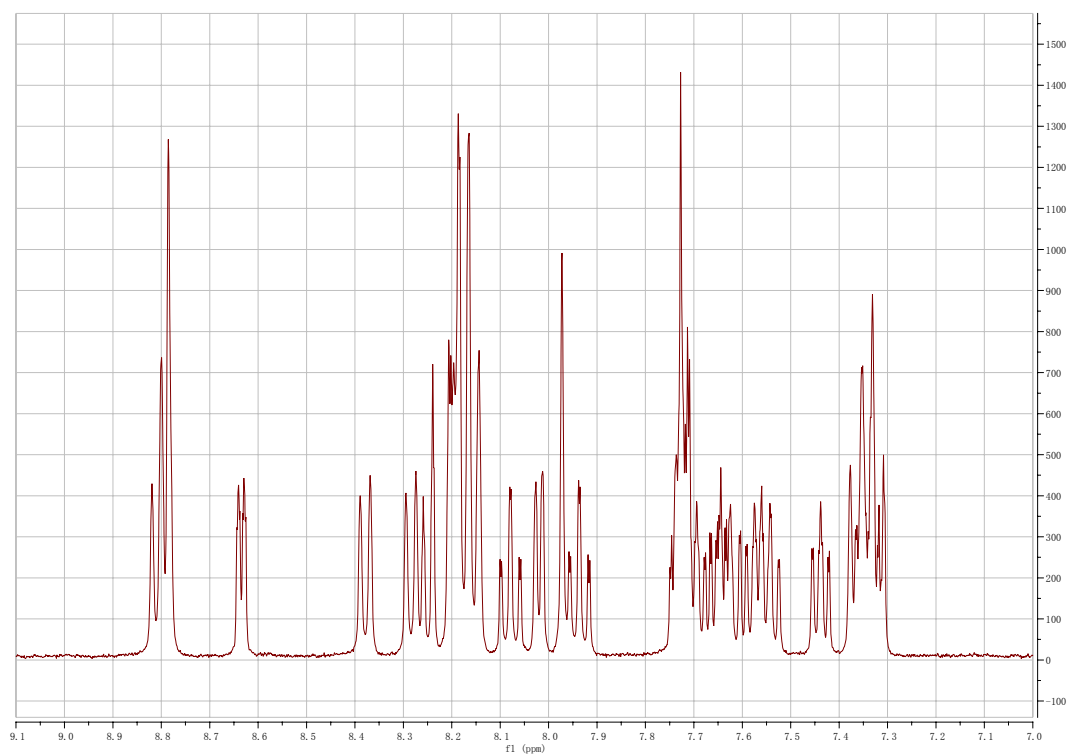

**Figure S2.** <sup>1</sup>H NMR spectra of **1** before (top) and after (bottom) irradiation (> 470 nm) for 1 h. All samples are in D<sub>2</sub>O/d<sub>6</sub>-DMSO (1/1).

## 2. Oxidation potential of $[\text{Ru}(\text{bpy})_2(\text{dpb})]^{2+}$

The half-wave oxidation potential of  $[\text{Ru}(\text{bpy})_2(\text{dpb})]^{2+}$  in acetonitrile was measured to be 1.40 V vs SCE (1.64 V vs NHE) using cyclic voltammetry method (Figure S3).

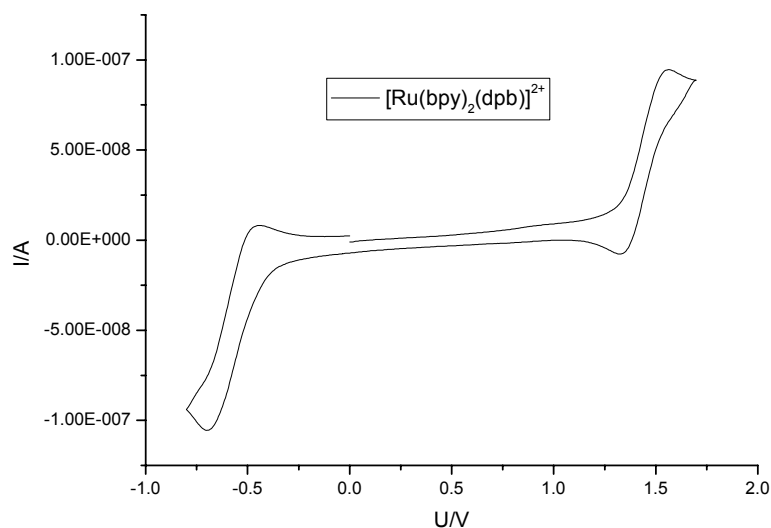

**Figure S3.** Cyclic voltammogram of  $[\text{Ru}(\text{bpy})_2(\text{dpb})]^{2+}$  (100  $\mu\text{M}$ ) in acetonitrile vs SCE. Scan rate: 150 mV/s.

## 3. Reduction potential of $[\text{Co}(\text{NH}_3)_5\text{Cl}]^{2+}$

The reduction of  $[\text{Co}(\text{NH}_3)_5\text{Cl}]^{2+}$  is a chemically irreversible process due to the lability of Co(II) complex.<sup>[1]</sup> Thus the reduction turn-on potential, which was measured to be 0.064 V vs SCE (0.31 V vs NHE), was applied for the calculation of Rehm-Weller equation.

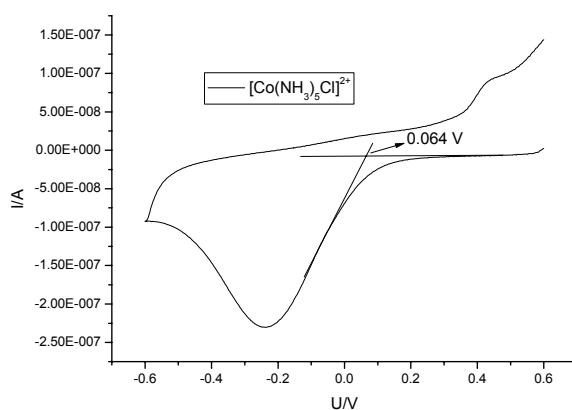

**Figure S4.** Cyclic voltammogram of  $[\text{Co}(\text{NH}_3)_5\text{Cl}]^{2+}$  in PBS buffer (pH = 7.4) vs SCE. Scan rate: 150 mV/s).

#### 4. 0-0 transition energy of the $^3\text{MLCT}$ state of $[\text{Ru}(\text{bpy})_2(\text{dpb})]^{2+}$

In many cases, the  $^3\text{MLCT}$  0-0 transition energy of a Ru complex may be estimated from the  $^3\text{MLCT}$  emission maximum measured in glass matrix at 77K. Generally,  $^3\text{MLCT}$  emission of a Ru complex will undergo a remarkable blue shift (about 40 nm)<sup>[2]</sup> in glass matrix at 77K than in the same solution but at room temperature. Thus, on the basis of the  $^3\text{MLCT}$  emission maxima of 926 nm at room temperature, the  $^3\text{MLCT}$  0-0 transition energy of  $[\text{Ru}(\text{bpy})_2(\text{dpb})]^{2+}$  was estimated to be 1.4 eV, equivalent to 886 nm (obtained by subtracting 40 nm from 926 nm).

[1] E. D. A. Stemp, M. R. Arkin, J. K. Barton, *J. Am. Chem. Soc.* 1997, **119**, 2921.

[2] (a) Y. Liu, R. Hammitt, D. A. Lutterman, R. P. Thummel, C. Turro, *Inorg. Chem.* 2007, **46**, 6011. (b) Y. Liu, R. Hammitt, D. A. Lutterman, R. P. Thummel, C. Turro, *Inorg. Chem.* 2009, **48**, 375
